# Supplementary figures and images for: Environmental morphing enables informed dispersal of the dandelion diaspore
Source: eLife journal article supplement (doi:10.7554/elife.81962), 2022-11-29

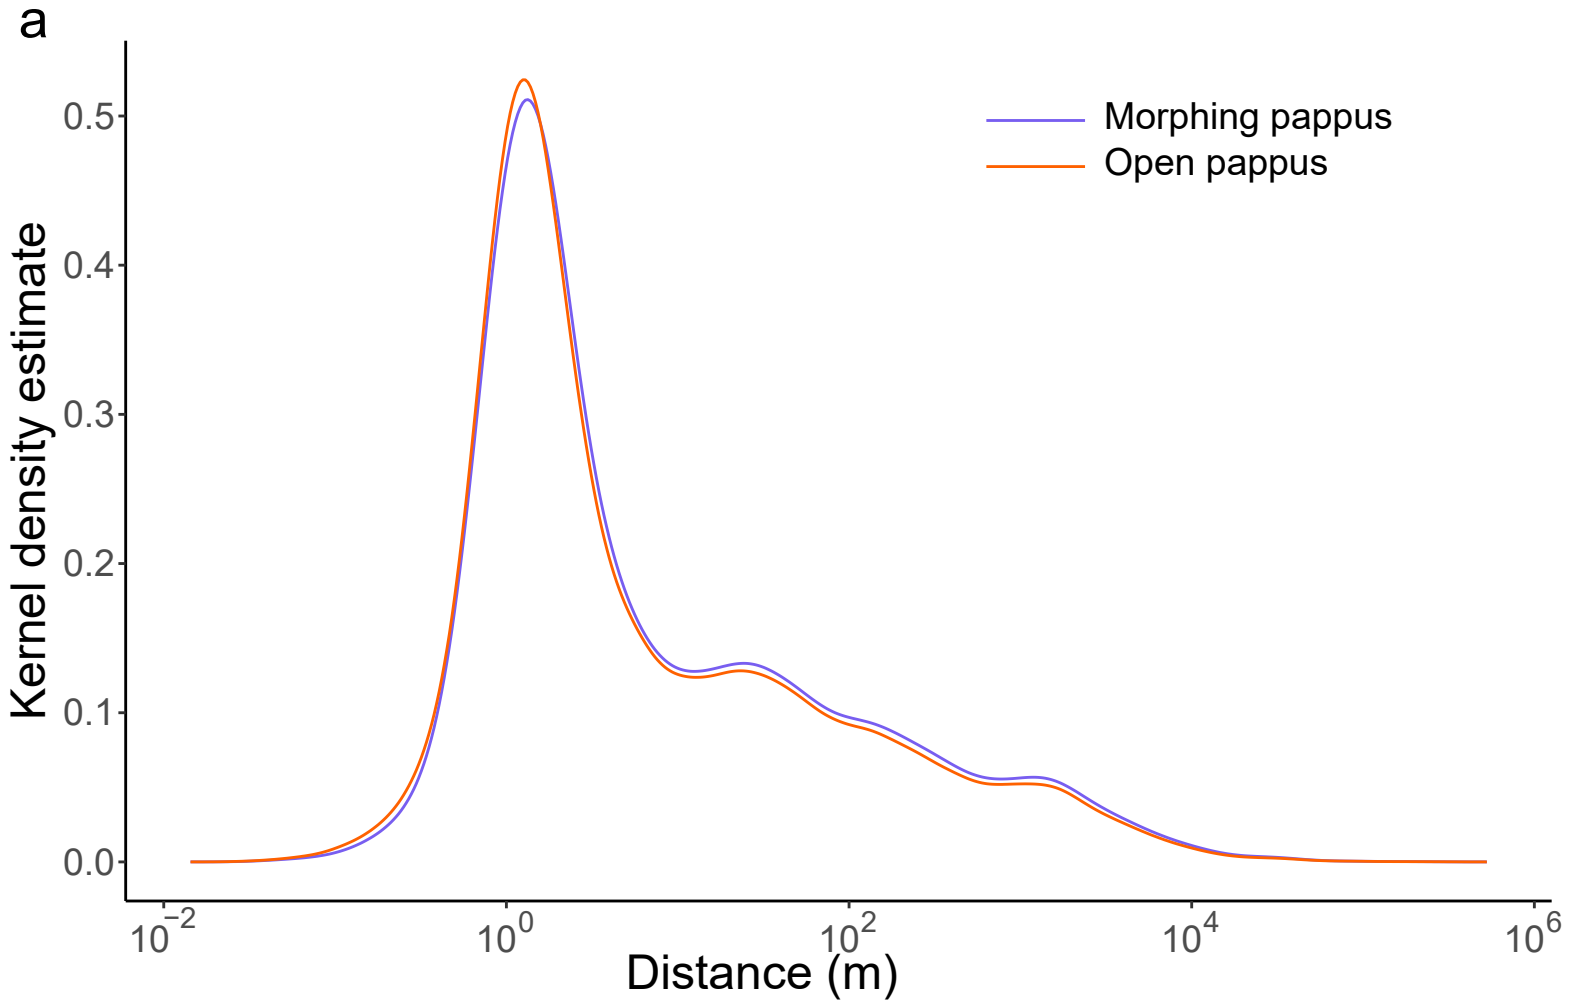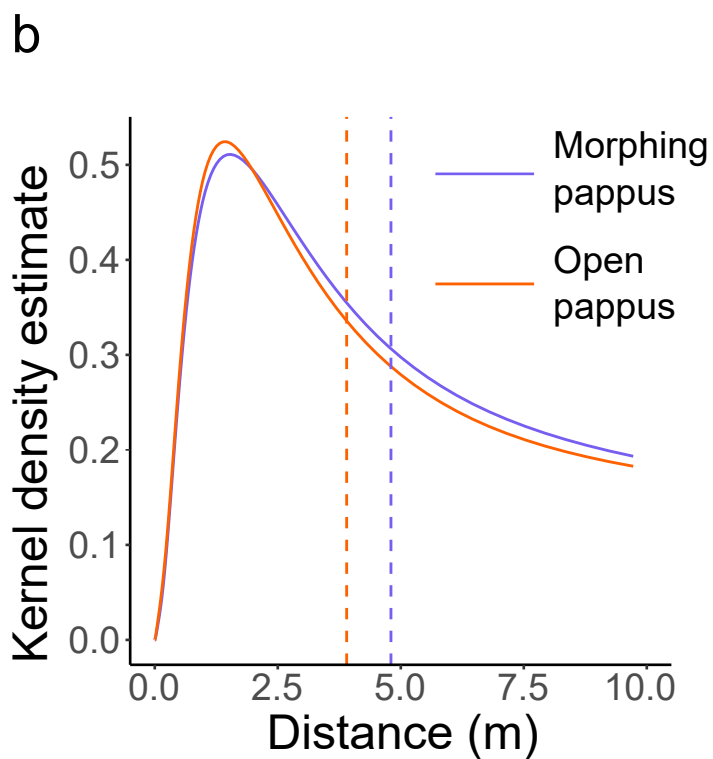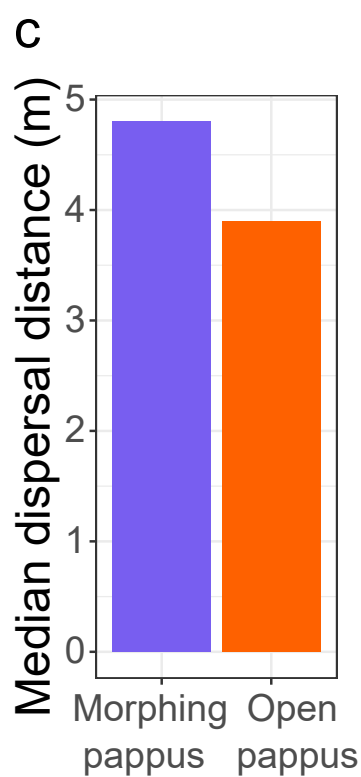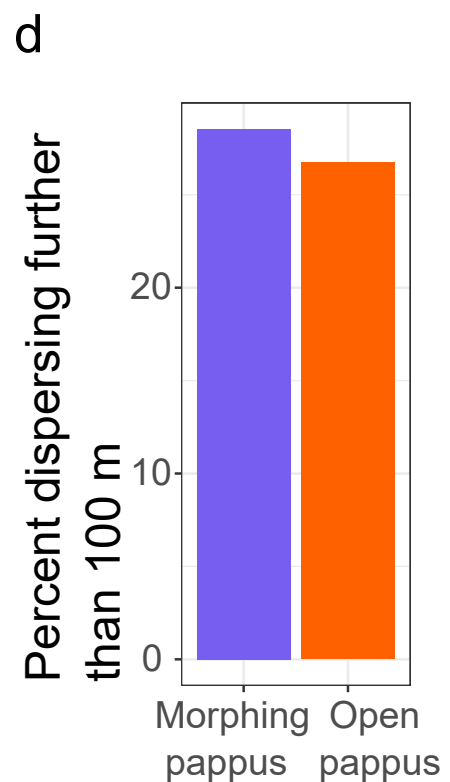

Supplement: supp [file elife-81962-supp-v1.zip]

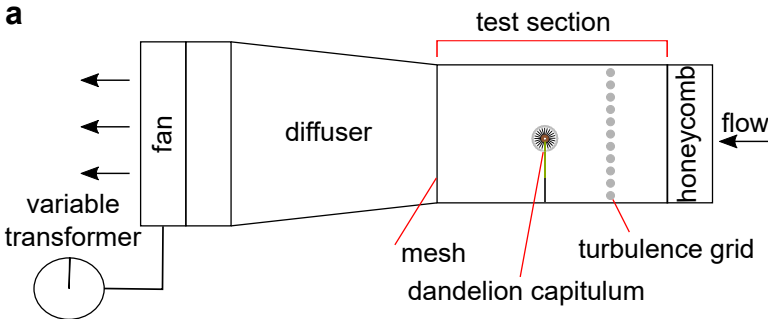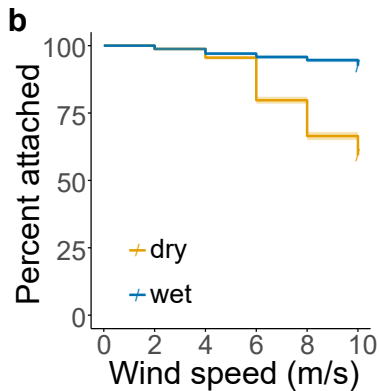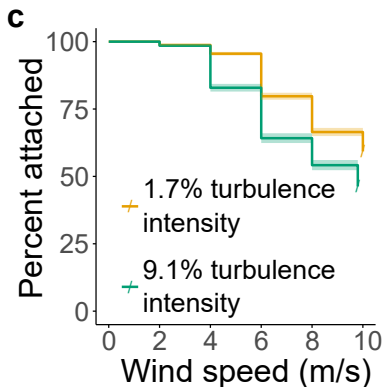

Supplement: supp [file elife-81962-supp-v1.zip]

# Manchester

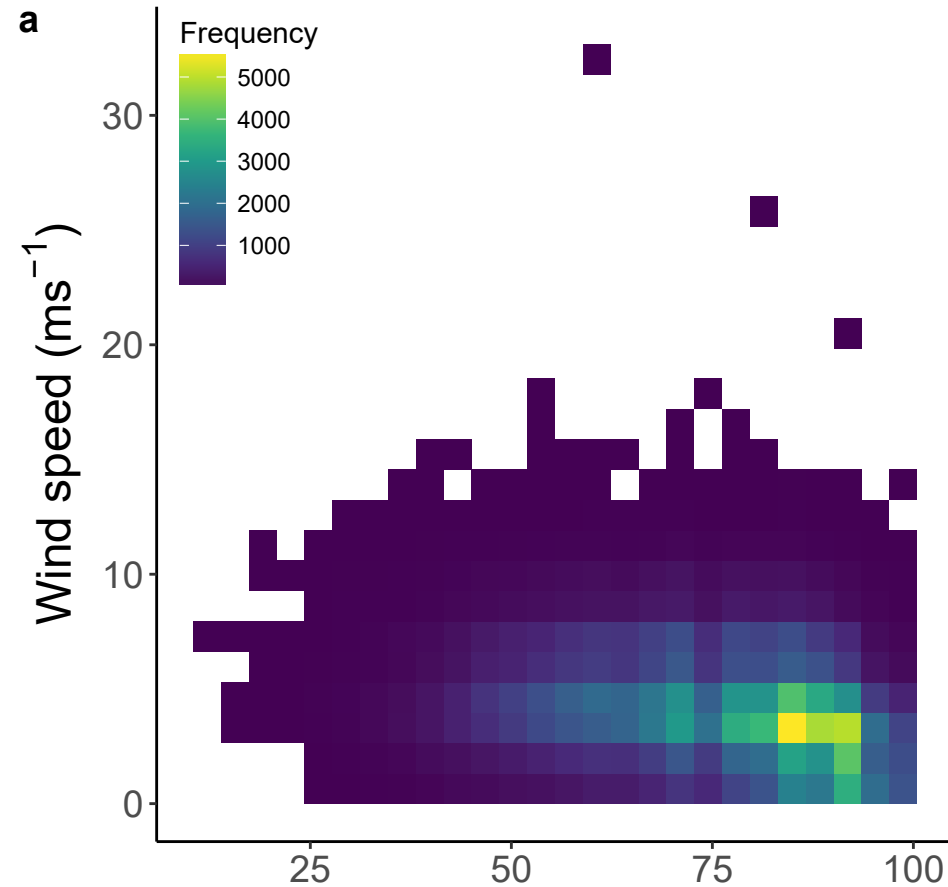

# Nottingham

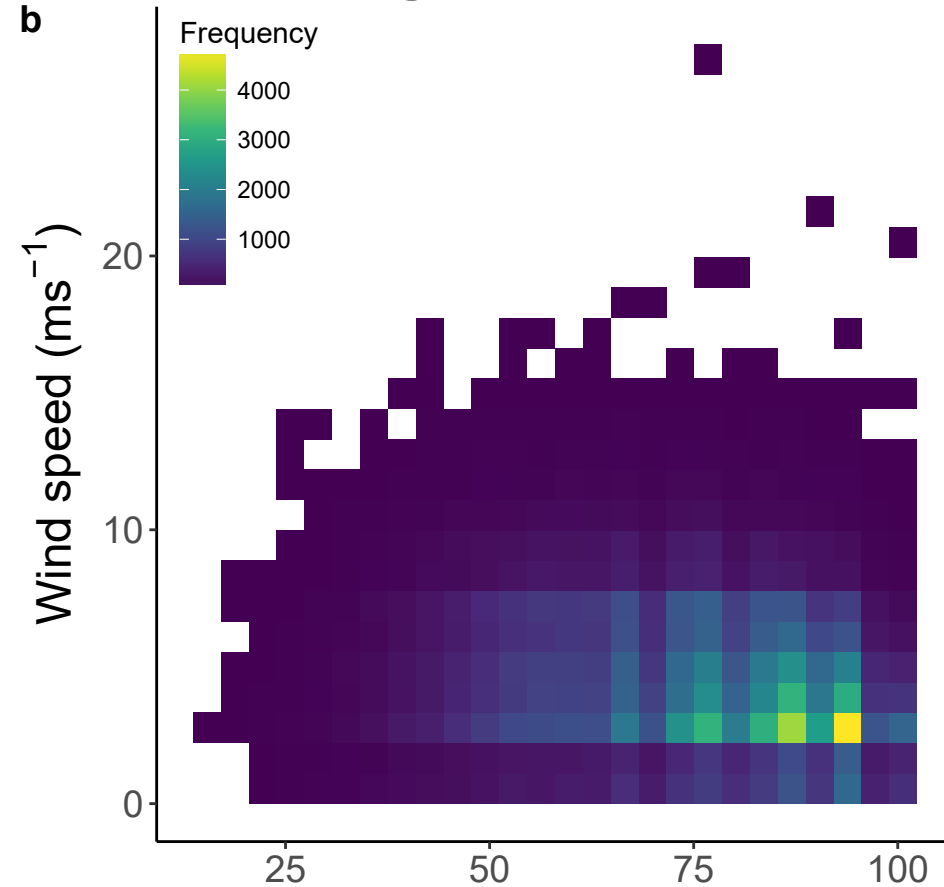

# Norwich

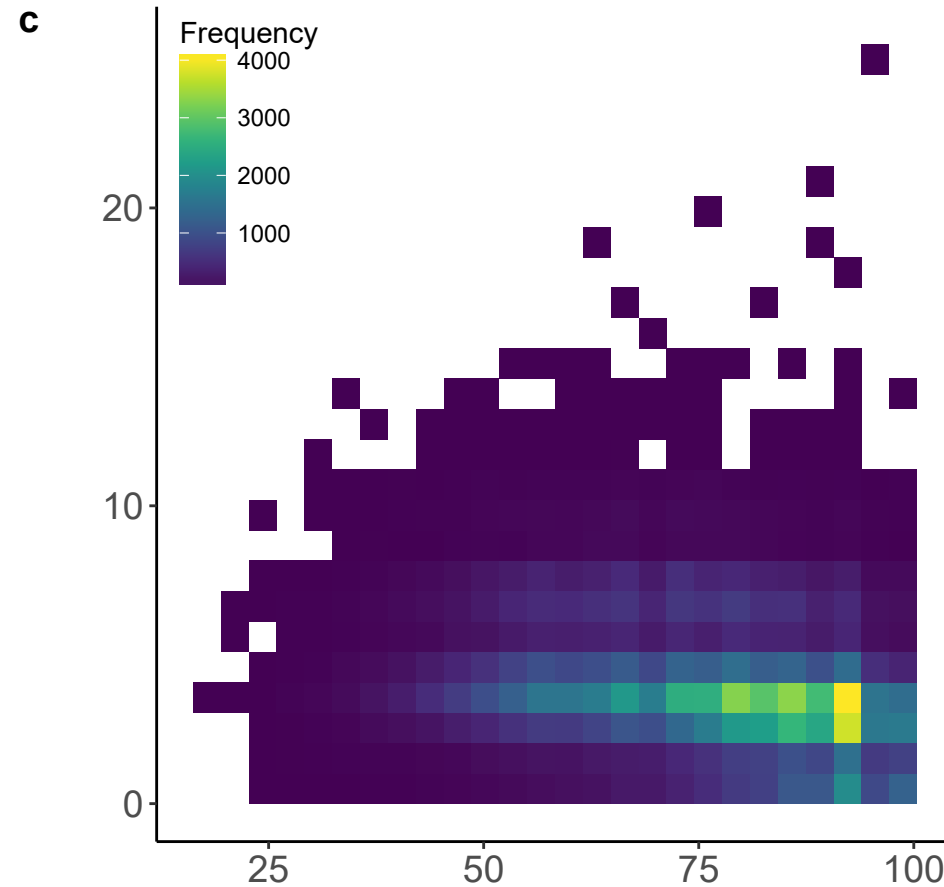

# Exeter

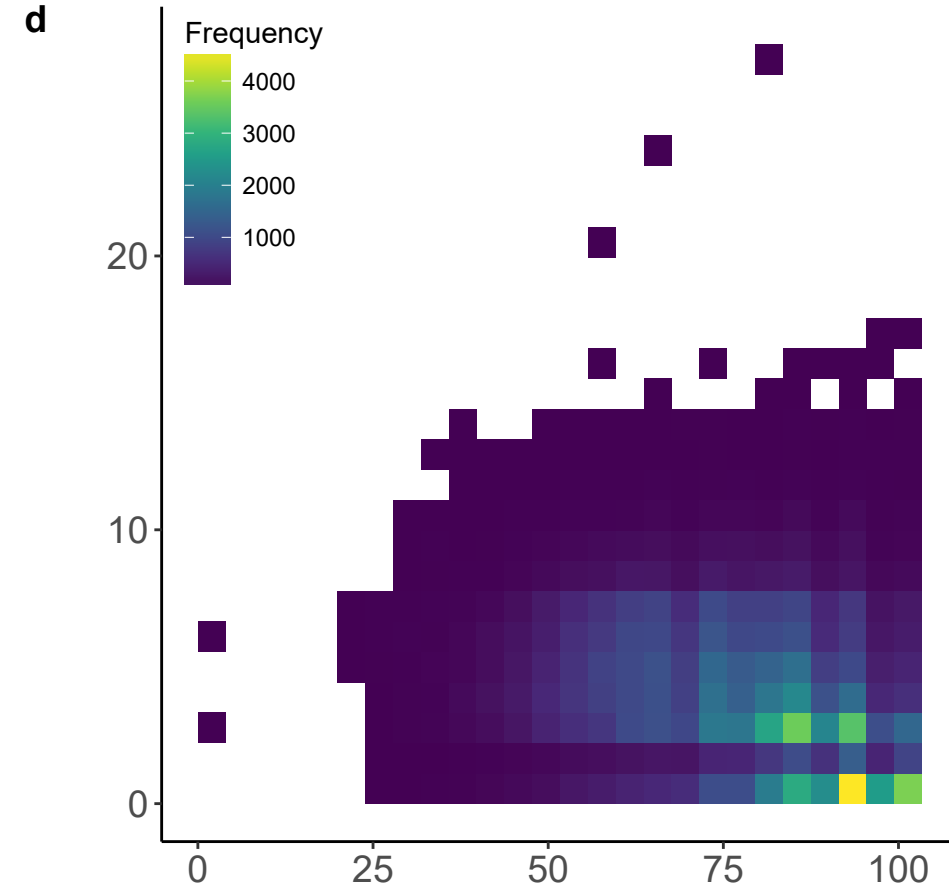

Supplement: supp [file elife-81962-supp-v1.zip]

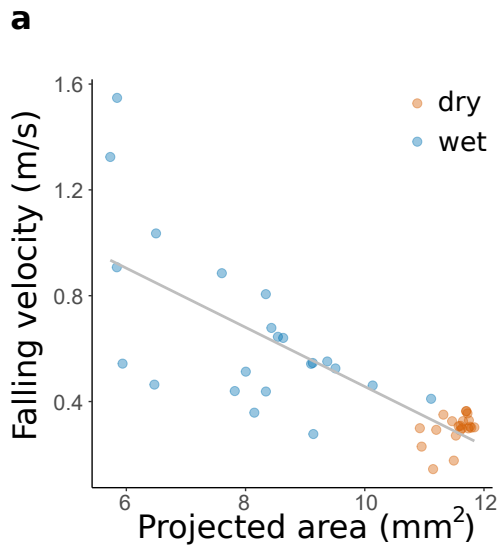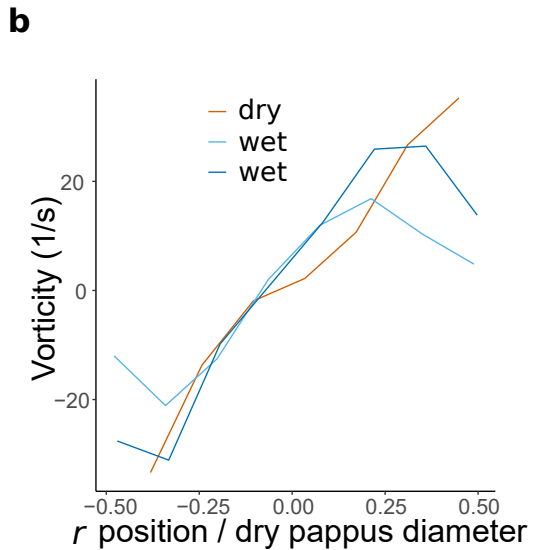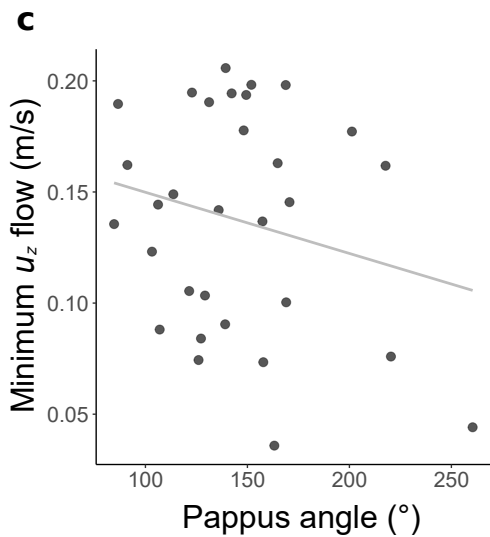

Supplement: supp [file elife-81962-supp-v1.zip]
